# Supplementary material
Source: publisher figshare collection journal article supplement (https://tandf.figshare.com/articles/dataset/_/1632862)
Supplement: Supplementary file 1 [file 2]

Table A1. Logistic regression modeling of factors (gender, age, day of week, season, vehicle) associated with BAC level above legal limits among inebriated FIDs (n=324)

| Independent variable | coefficient | S.E.  | Wald   | df | p (sig.) | Odds ratio (OR) | Variables in the Equation |       |
|----------------------|-------------|-------|--------|----|----------|-----------------|---------------------------|-------|
|                      |             |       |        |    |          |                 | 95% C.I. for OR           |       |
|                      |             |       |        |    |          |                 | Lower                     | Upper |
| Gender*              | 0.977       | 0.407 | 5.767  | 1  | 0.016    | 2.655           | 1.197                     | 5.892 |
| Age*                 | -0.031      | 0.006 | 22.993 | 1  | 0.000    | 0.970           | 0.957                     | 0.982 |
| Day (Tu)             |             |       | 12.219 | 6  | 0.057    |                 |                           |       |
| Day (We)             | 0.248       | 0.392 | 0.402  | 1  | 0.526    | 1.282           | 0.595                     | 2.763 |
| Day (Fr)             | 0.052       | 0.398 | 0.017  | 1  | 0.896    | 1.054           | 0.483                     | 2.298 |
| Day (Mo)             | 0.687       | 0.382 | 3.238  | 1  | 0.072    | 1.988           | 0.941                     | 4.201 |
| Day (Th)             | 0.547       | 0.372 | 2.165  | 1  | 0.141    | 1.728           | 0.834                     | 3.582 |
| Day (Su)             | 0.938       | 0.354 | 7.033  | 1  | 0.008    | 2.555           | 1.277                     | 5.112 |
| Day (Sa)             | 0.581       | 0.350 | 2.754  | 1  | 0.097    | 1.788           | 0.900                     | 3.550 |
| Season               |             |       |        |    |          |                 |                           |       |
| (winter)             |             |       | 3.655  | 3  | 0.301    |                 |                           |       |
| Spring               | 0.242       | 0.280 | 0.747  | 1  | 0.387    | 1.274           | 0.736                     | 2.206 |
| Autumn               | 0.264       | 0.275 | 0.921  | 1  | 0.337    | 1.302           | 0.760                     | 2.230 |
| Summer               | -0.119      | 0.272 | 0.192  | 1  | 0.662    | 0.888           | 0.521                     | 1.512 |
| Vehicle              |             |       |        |    |          |                 |                           |       |
| (truck)              |             |       | 5.826  | 2  | 0.054    |                 |                           |       |
| Motorcycle           | 0.418       | 0.520 | 0.645  | 1  | 0.422    | 1.519           | 0.548                     | 4.209 |
| Car                  | 0.840       | 0.493 | 2.902  | 1  | 0.088    | 2.317           | 0.881                     | 6.090 |

ROC=0.673; Hosmer-Lemeshow  $\chi^2(8)=7.652$ , p=0.468; \*-statistically significant independent variable
