# Supplementary material
Source: publisher figshare collection journal article supplement (https://tandf.figshare.com/articles/dataset/_/1632862)
Supplement: Supplementary file 2 [file 2]

Figure A1. ROC curve for binary logistic regression model of factors (gender, age, day of week, season and vehicle) associated with BAC level above legal limits among inebriated FIDs

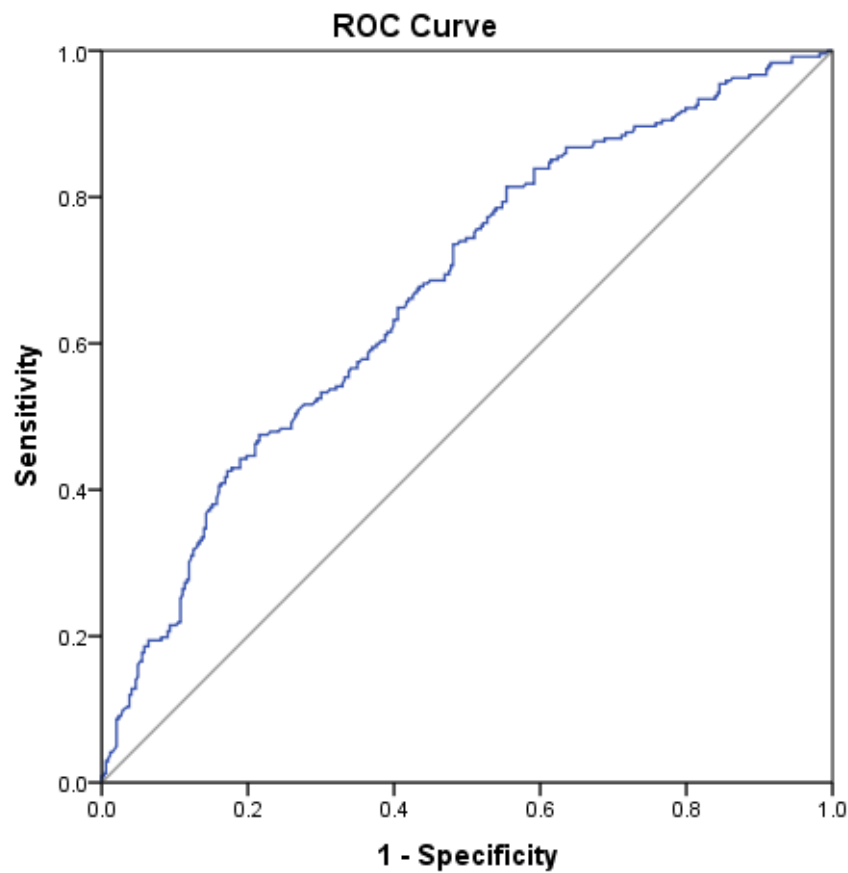

#### Area Under the Curve

Test Result Variable(s): Predicted probability

| Area | Std. Error <sup>a</sup> | Asymptotic Sig. <sup>b</sup> | Asymptotic 95% Confidence Interval |             |
|------|-------------------------|------------------------------|------------------------------------|-------------|
|      |                         |                              | Lower Bound                        | Upper Bound |
| .673 | .022                    | .000                         | .629                               | .717        |

The test result variable(s): Predicted probability has at least one tie between the positive actual state group and the negative actual state group. Statistics may be biased.

a. Under the nonparametric assumption

b. Null hypothesis: true area = 0.5
